# Supplementary material
Source: ML conference proceedings conference paper supplement (https://openreview.net/forum?id=yOkmUBv9ed)
Supplement: supplementary_material [file attachment]

## A TRAINING LOSS

We demonstrate the training loss optimization process with  $BERT_{base}$  model on HotpotQA dataset. The loss is logged every 200 updates. The regularization of BST objective on attention mechanism doesn't reduce the optimization speed.

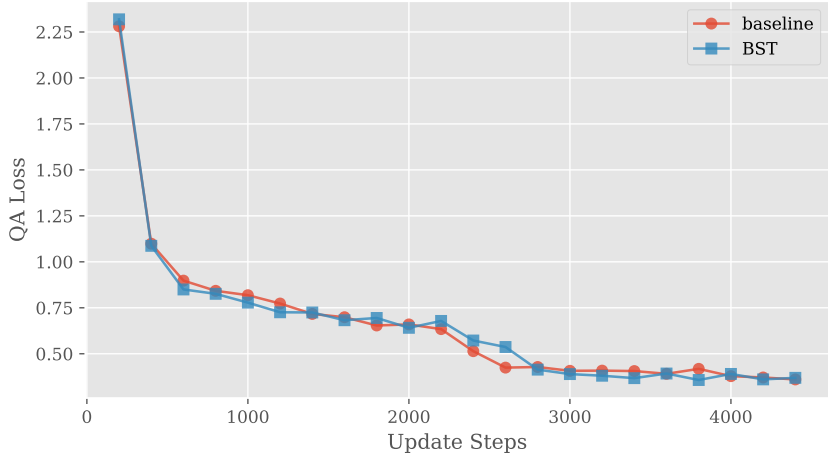

Figure 4: Training loss optimization process of baseline  $BERT_{base}$  and with BST .

## B BST CLASSIFIER F1 SCORE

Because we only show the BST classifier accuracy performance of layer 4 and middle layer in the main text for conciseness. Here we present the F1 score results of  $BERT_{base}$  and  $BERT_{large}$  results of all layers.

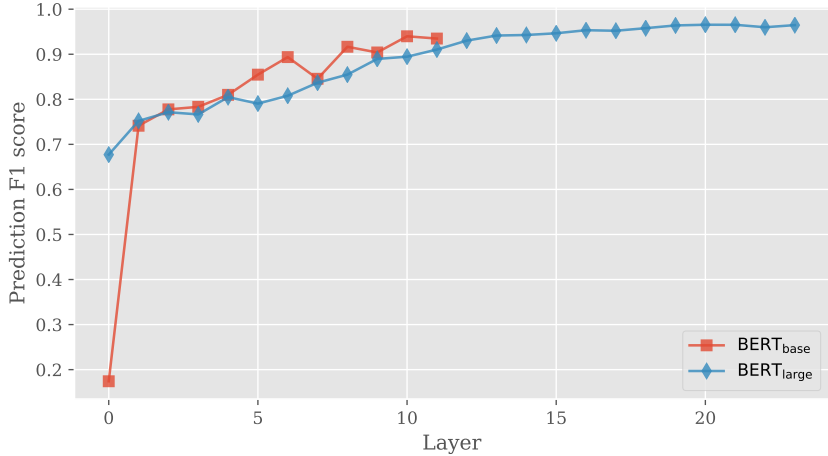

Figure 5: BST classifier F1 score of each layer of  $BERT_{base}$  and  $model_{large}$  on SQuAD dataset.
